# Supplementary material
Source: publisher site journal article supplement (https://www.spandidos-publications.com/921/downloadSupplementary)

Figure S1. The efficacy of AQP4 siRNA. The efficacy of siRNA was measured using western blot analysis. The results demonstrated the AQP4 protein expression was reduced after transfection with siRNA. AQP-4, aquaporin-4; si, small interfering; RNAi, RNA interference.

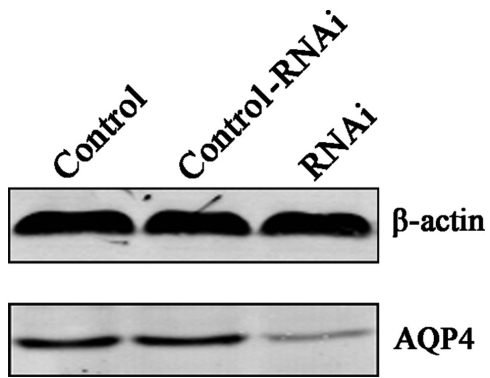

Supplement: Supplementary file 1 [file downloadSupplementary]
